# Supplementary material for: Insight into the efficient transfection activity of a designed low aggregated magnetic polyethyleneimine/DNA complex in serum-containing medium and the application in vivo
Source: Royal Society of Chemistry journal article supplement (doi:10.1039/c4bm00317a), 2014-11-05
Supplement: c4bm00317a2.pdf [file c4bm00317a2.pdf]

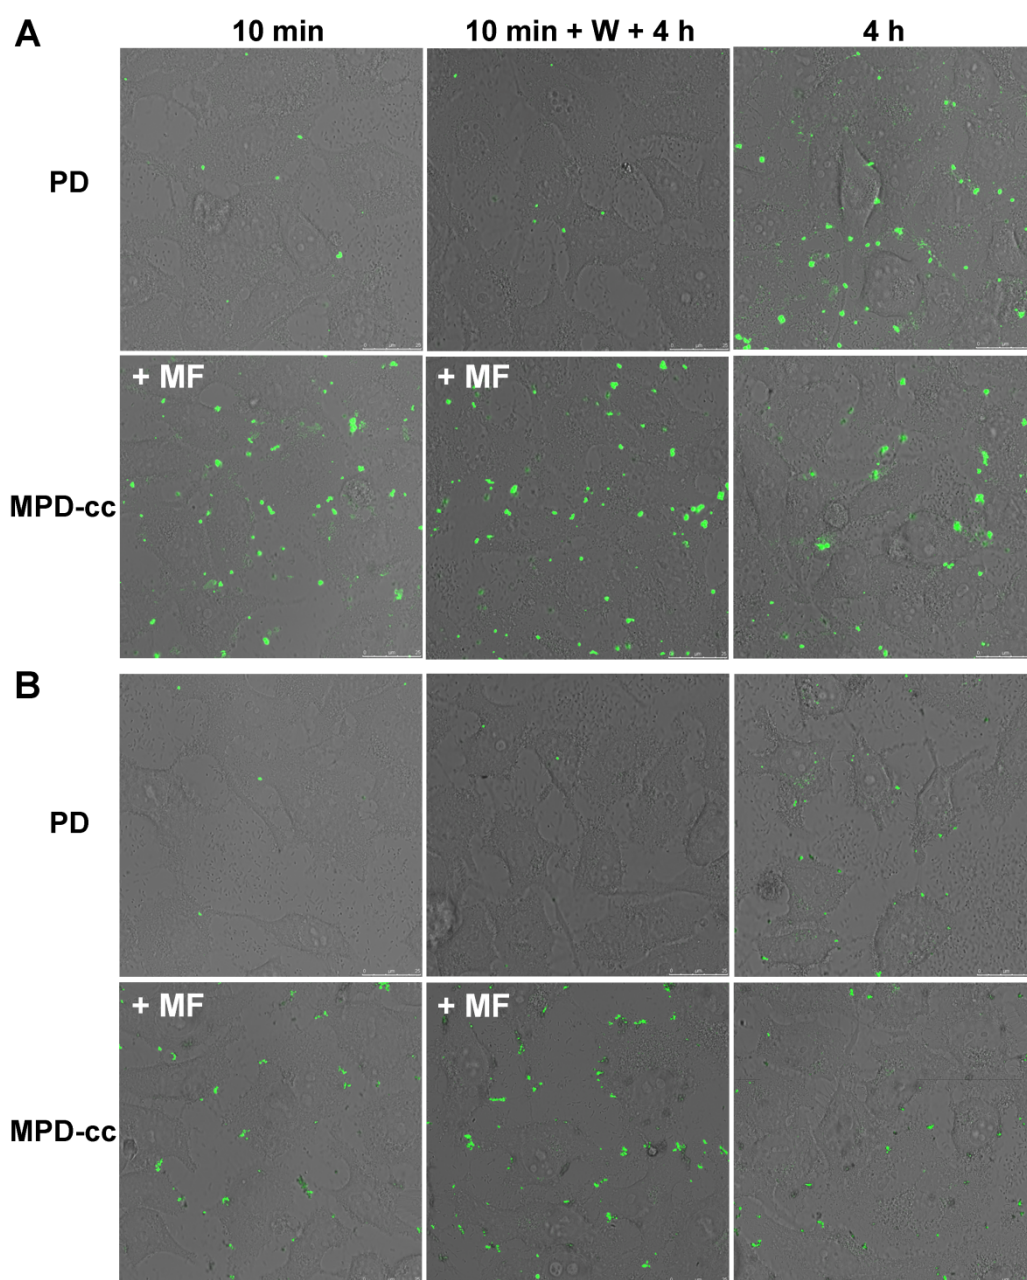

**Figure S2.** Confocal images of HepG2 cells incubated with fluorescent gene complexes in the presence of serum. PEI was labeled with FITC for cellular uptake evaluation (A), and the extracellular fluorescence of FITC was quenched by trypan blue for internalization measurement (B). Three kinds of incubation modes with gene complexes were used: (I) 10 min incubation, (II) 4 h incubation, (III) 10 min incubation, washing with cold PBS and another 4 h incubation with fresh culture medium (10 min + W + 4 h). 120 mT magnetic field (MF) was applied for the 10-min incubation in magnetofection. (scale bar = 25  $\mu$ m).
