# Supplementary material for: Insight into the efficient transfection activity of a designed low aggregated magnetic polyethyleneimine/DNA complex in serum-containing medium and the application in vivo
Source: Royal Society of Chemistry journal article supplement (doi:10.1039/c4bm00317a), 2014-11-05
Supplement: c4bm00317a3.pdf [file c4bm00317a3.pdf]

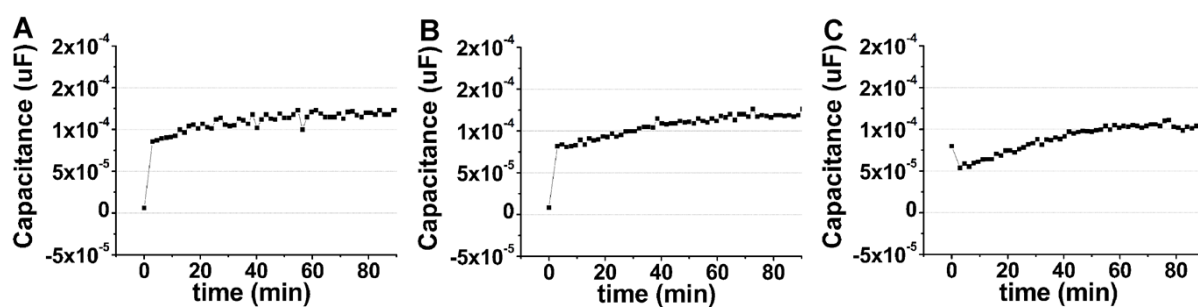

**Figure S3.** Dynamic monitoring the change in membrane capacitance of HepG2 cells by EIS. After being added with HBG (A) as control, PD complexes (B) and MPD-cc complexes (C) in the presence of serum, cells were real-time monitored for 90 min under magnetic field of 120 mT.
