# Supplementary figures and images for: Insight into the efficient transfection activity of a designed low aggregated magnetic polyethyleneimine/DNA complex in serum-containing medium and the application in vivo
Source: Royal Society of Chemistry journal article supplement (doi:10.1039/c4bm00317a), 2014-11-05

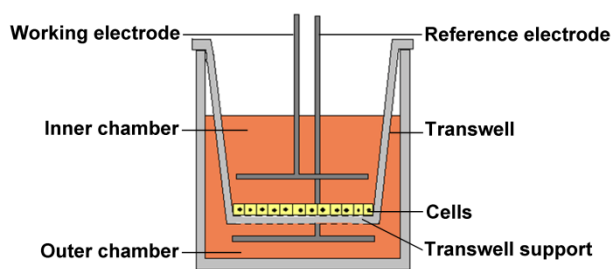

**Figure S1.** The cell-device system in impedance measurement.

Supplement: c4bm00317a1.pdf [file c4bm00317a1.pdf]
